# Supplementary material for: The impact of hyperglycemia upon BeWo trophoblast cell metabolic function: A multi-OMICS and functional metabolic analysis
Source: PubMed Central journal article supplement (PMC10022812; doi:10.1371/journal.pone.0283118), 2023-03-17
Supplement: pone.0283118.s001.pdf [file pone.0283118.s001.pdf]

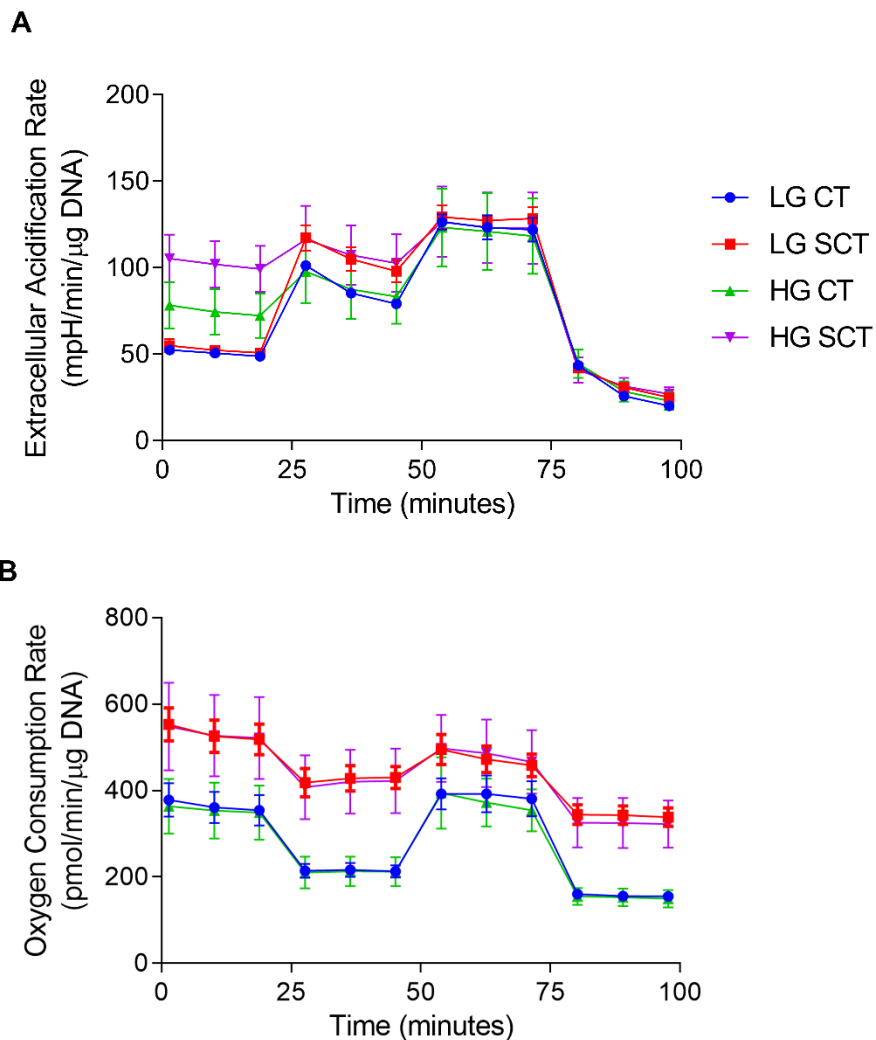

### S1 Fig. Representative Seahorse Assay Tracings

(A) Representative Seahorse XF Glycolysis Stress Test assay tracings; data is presented as mean Extracellular Acidification Rate (ECAR)  $\pm$  SEM of the technical replicates of each treatment group from one experiment. (B) Representative Seahorse XF Mito Stress Test assay tracings; data is presented as mean Oxygen Consumption Rate (OCR)  $\pm$  SEM of the technical replicates of each treatment group from one experiment.

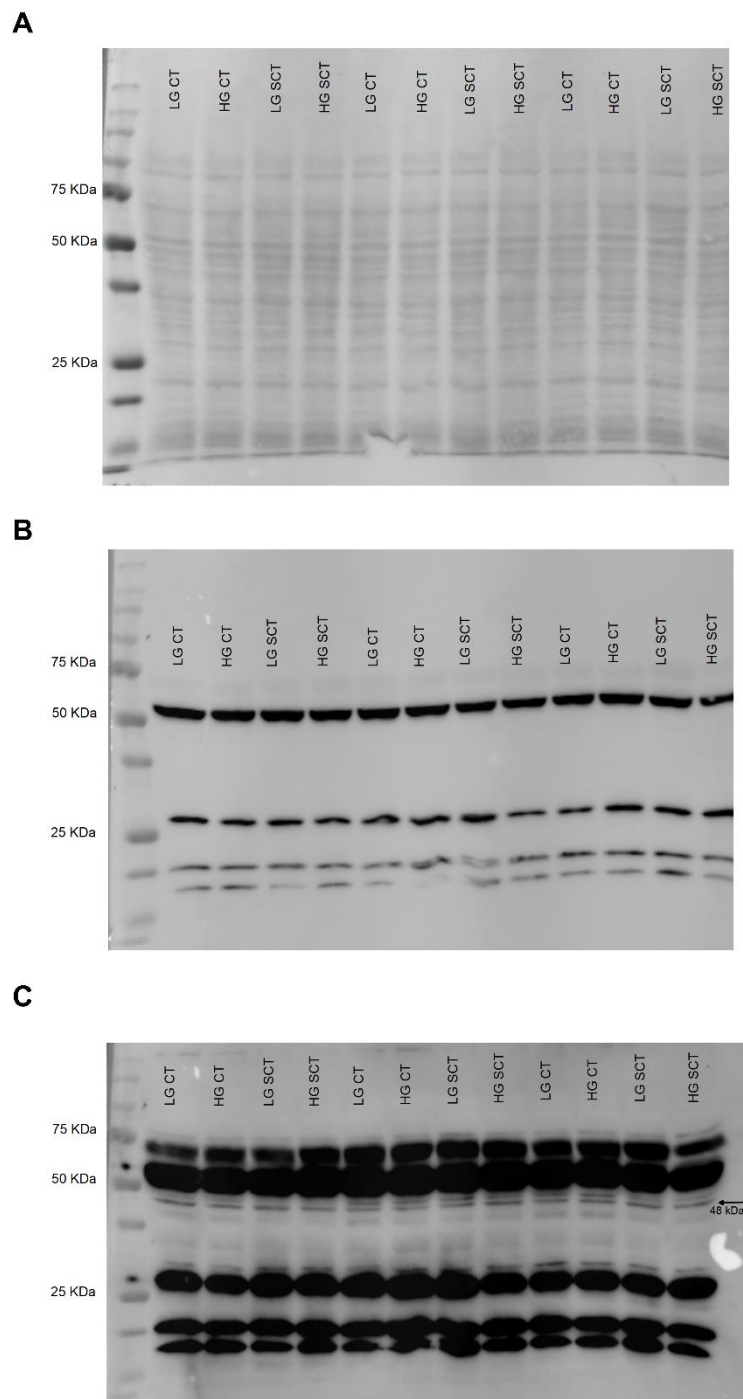

**S2 Fig. Full length representative images of Mito Profile immunoblots.**

(A) representative full-length ponceau image used to quantify total lane protein; (B) representative full length blot used to quantify band abundance for ETC complexes I (18 kDa), II (29 kDa), IV (22 kDa), and V (54 kDa) (9-second ChemiDoc exposure); (C) representative full length blot used to quantify band abundance for ETC complex III (48 kDa) (140-second ChemiDoc exposure).

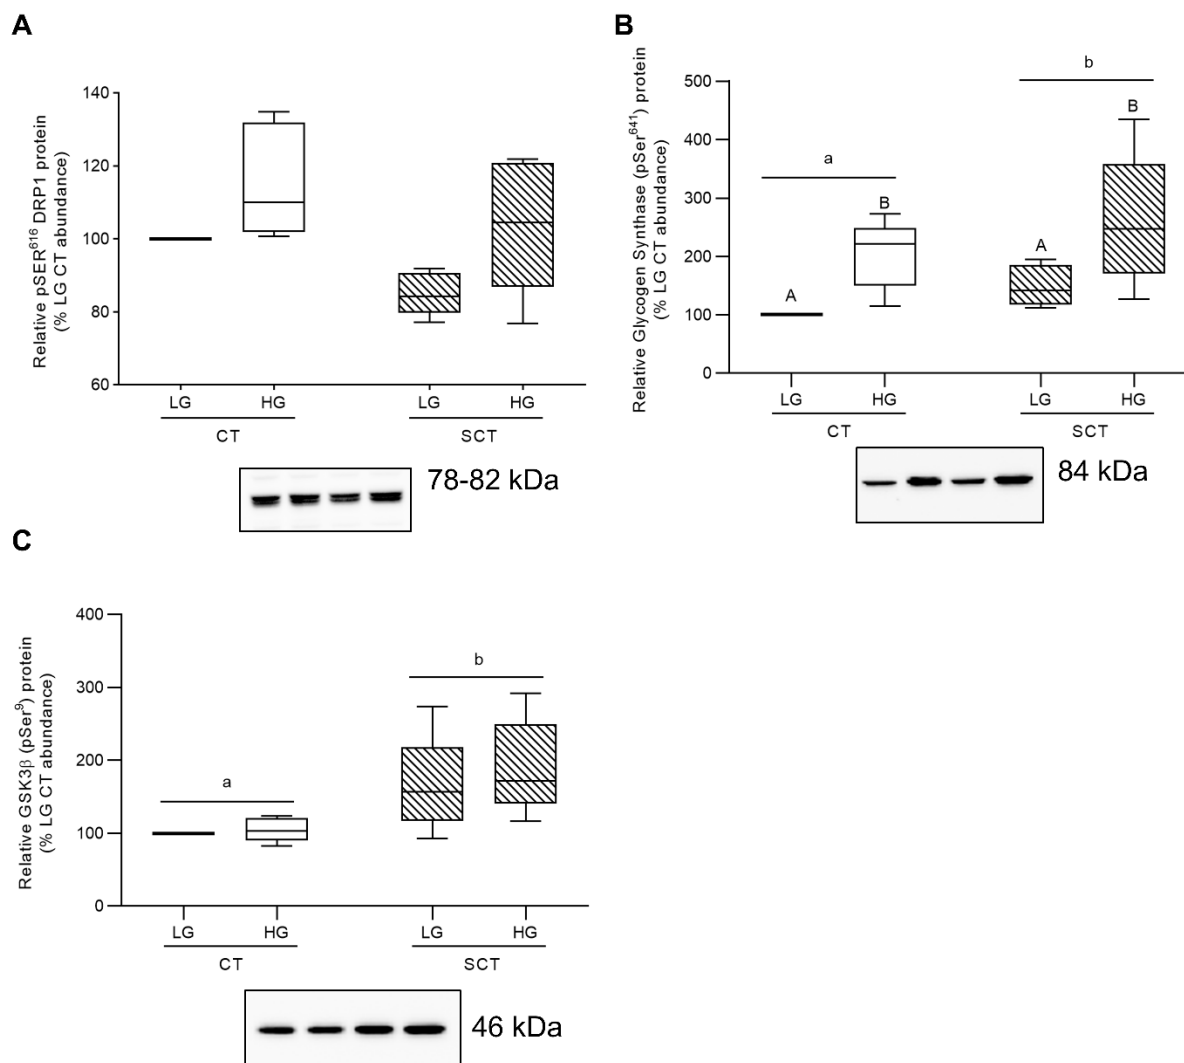

### S3 Fig. Phosphorylated western blot target analysis relative to total lane protein.

Western blot analysis was performed to quantify the abundance of the post-translational modifications: **(A)** pSer<sup>616</sup> DRP1, **(B)** pSer<sup>641</sup> Glycogen Synthase, and **(C)** pSer<sup>9</sup> GSK3β. Different lower-case letters denote differentiation state-dependent differences in protein abundance, and different upper-case letters denote glucose-level dependent differences within a differentiation state (Randomized-Block Two-Way ANOVA (2WA), and Sidak's multiple comparisons test,  $p < 0.05$ ,  $n = 5$ /group). Protein band density was normalized to total lane protein (ponceau) for statistical analysis and the data is presented as percent of LG CT abundance for visualization ( $n = 5$ /group).

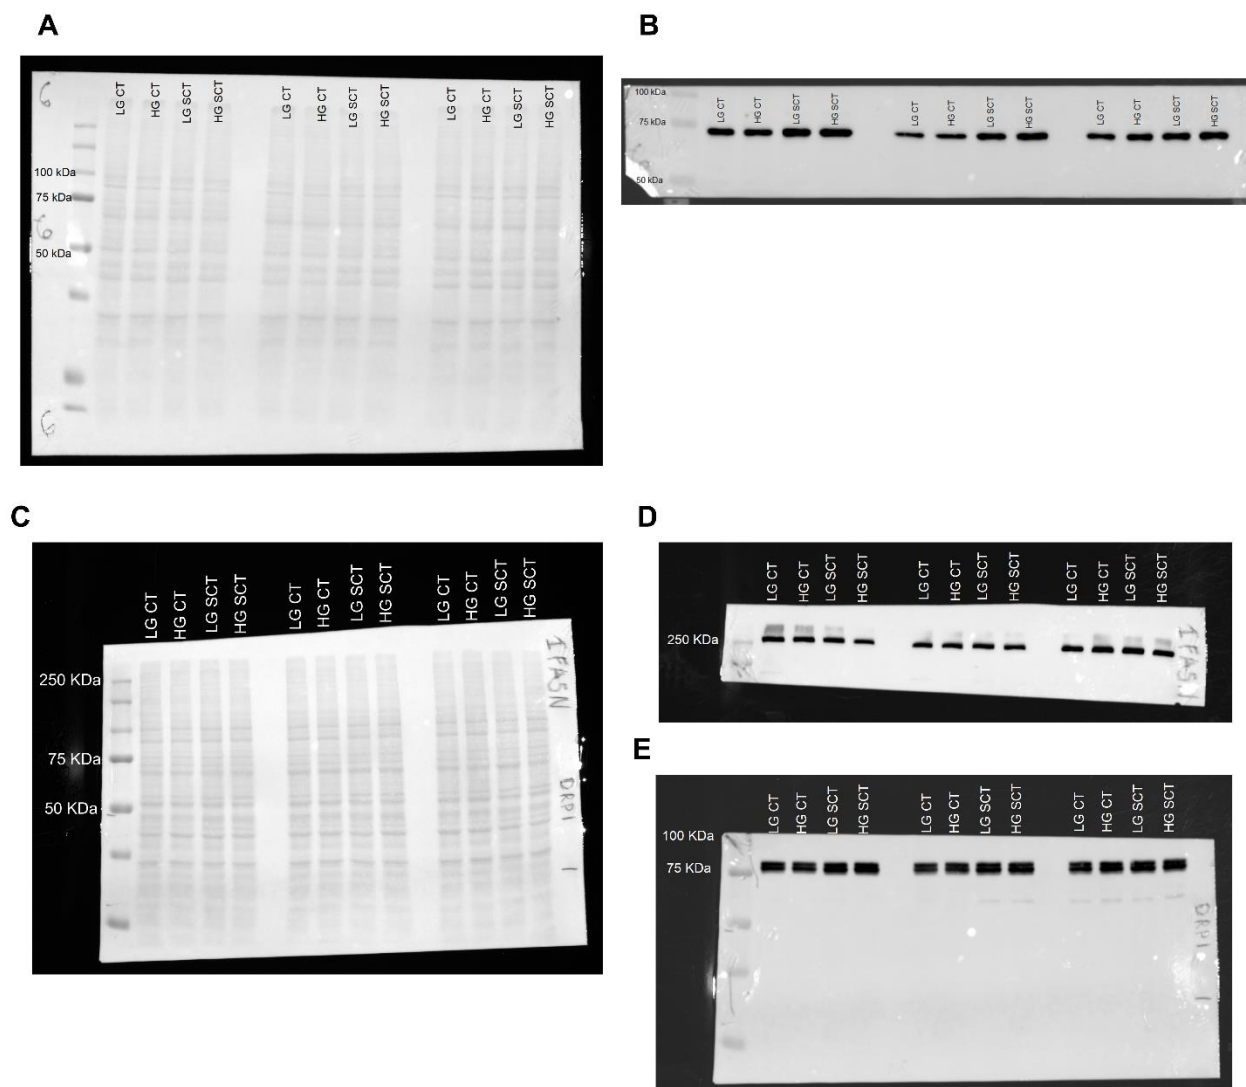

**S4 Fig. Uncropped representative images of ACSL1, FASN, and total DRP1 immunoblots.**

(A) Representative full length ponceau used to quantify total lane protein in ACSL1 immunoblots; (B) uncropped ACSL1 bands; (C) representative full length ponceau used to quantify total lane protein in FASN and total DRP1 immunoblots; (D) uncropped FASN bands; (E) uncropped total DRP1 bands.

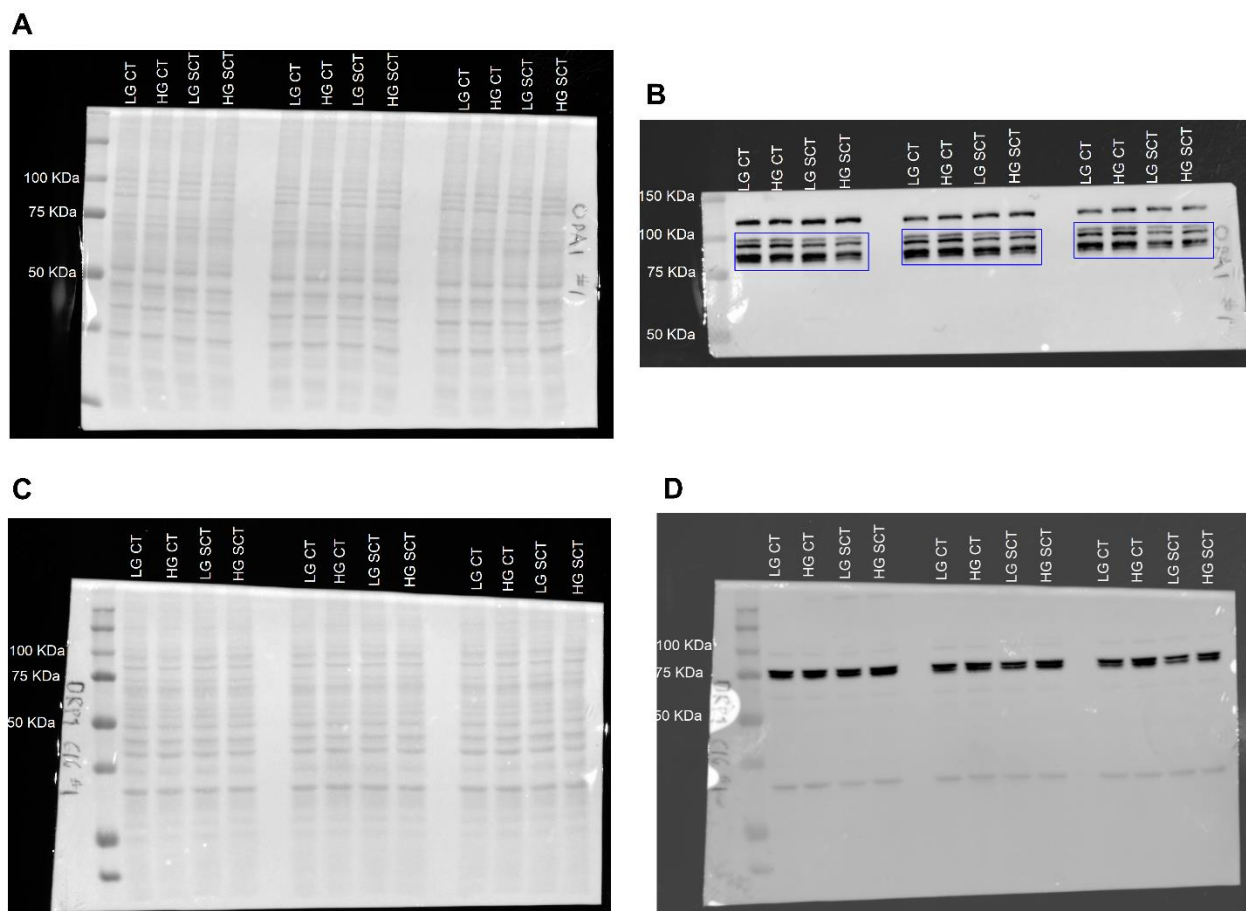

**S5 Fig. Uncropped representative images of OPA1 immunoblots, and phosphorylated (Ser<sup>616</sup>) DRP1.**

(A) Representative full length ponceau used to quantify total lane protein in OPA1 immunoblots; (B) uncropped OPA1 bands; (C) representative full length ponceau used to quantify total lane protein in phosphorylated DRP1 immunoblots; and (D) uncropped pSER<sup>616</sup> DRP1 bands. Bands between 80-100 KDa were utilized to quantify OPA1 protein abundance and are highlighted by blue boxes

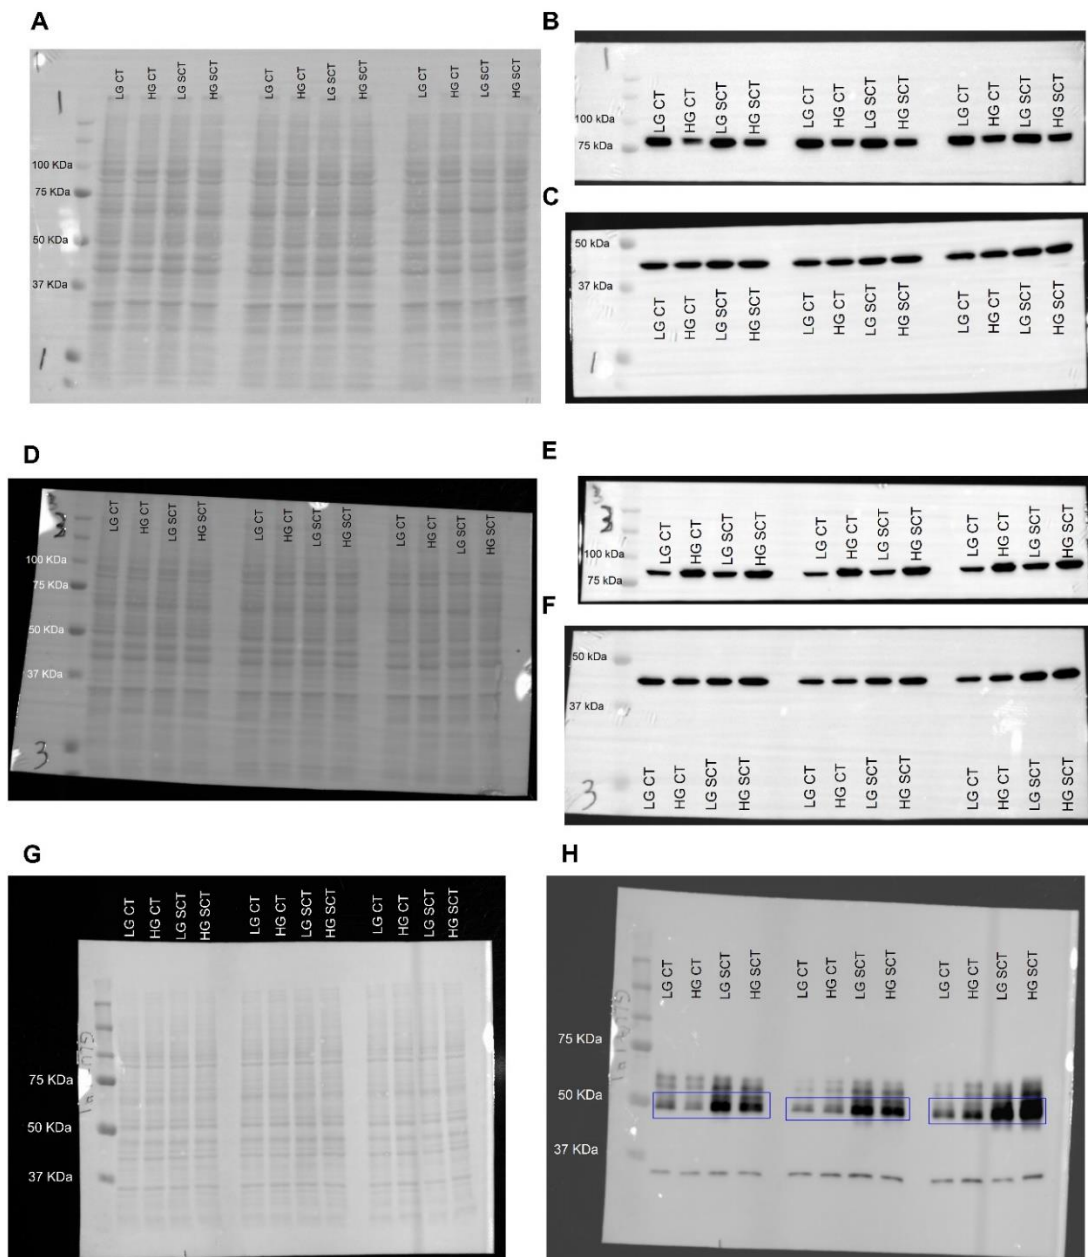

**S6 Fig. Uncropped representative images of total and phosphorylated glycogen synthase and GSK3β immunoblots, as well as GLUT1 immunoblots.**

(A) Representative full length ponceau used to quantify total lane protein in total glycogen synthase and GSK3β immunoblots; (B) uncropped total Glycogen synthase bands; (C) uncropped total GSK3β bands; (D) representative full length ponceau used to quantify total lane protein in phosphorylated glycogen synthase and GSK3β blots; (E) uncropped pSer<sup>641</sup> Glycogen synthase bands; (F) uncropped pSer<sup>9</sup> GSK3β bands; (G) representative full length ponceau used to quantify total lane protein in GLUT1 immunoblots; and (H) uncropped GLUT1 bands. Bands between 45-55 KDa were utilized to quantify GLUT1 protein abundance and are highlighted by blue boxes.

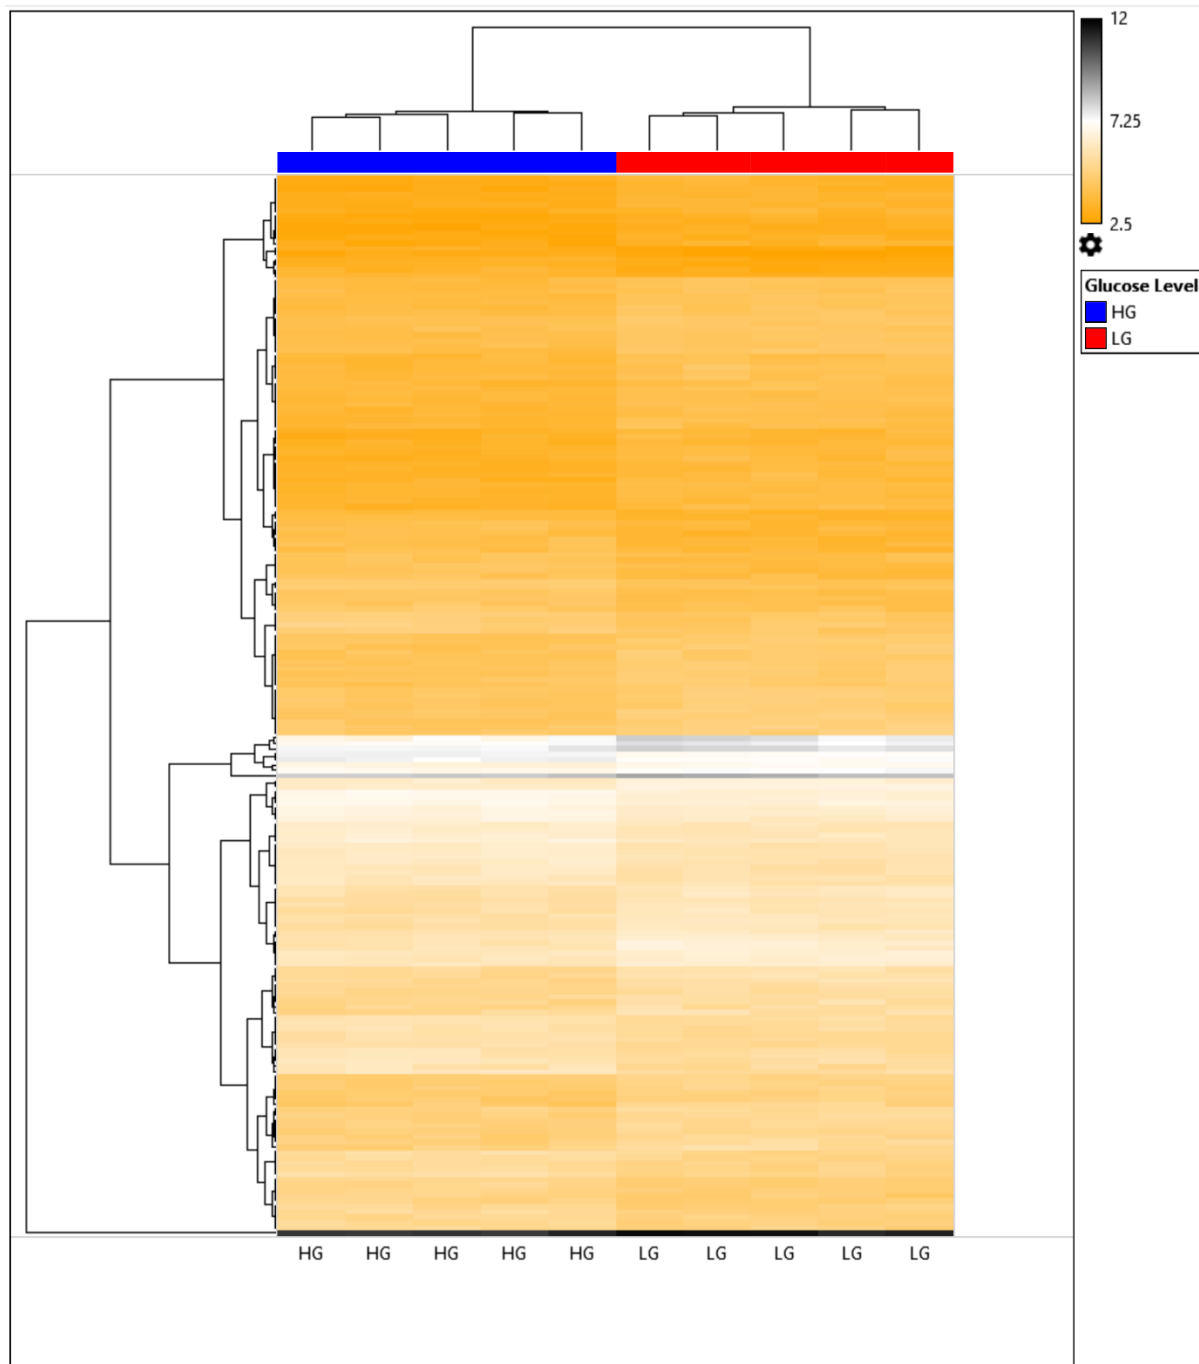

**S7 Fig. Heat map visualization of differentially expressed genes in hyperglycemic (HG) cultured BeWo cytotrophoblast cells.**

Each column of the heat map represents an individual sample, with blue columns representing HG-cultured BeWo CT cells and the red columns representing low-glucose (LG) cultured BeWo CT cells. Each row represents an individual differentially expressed gene. Gene expression intensity is color coded with orange representing low-expression genes and black representing high-expression genes.

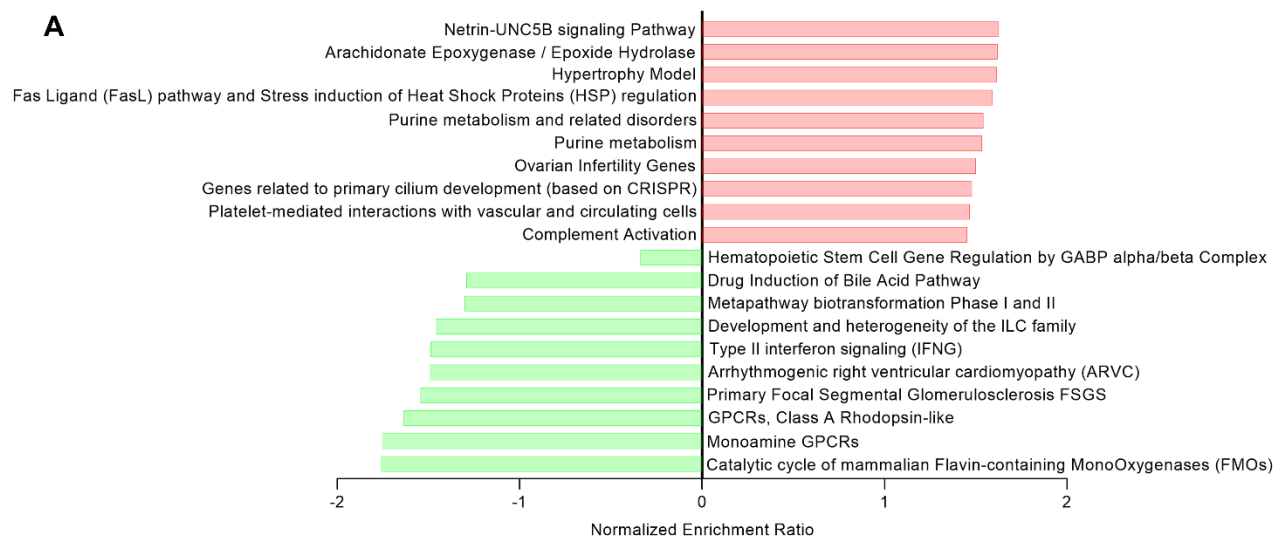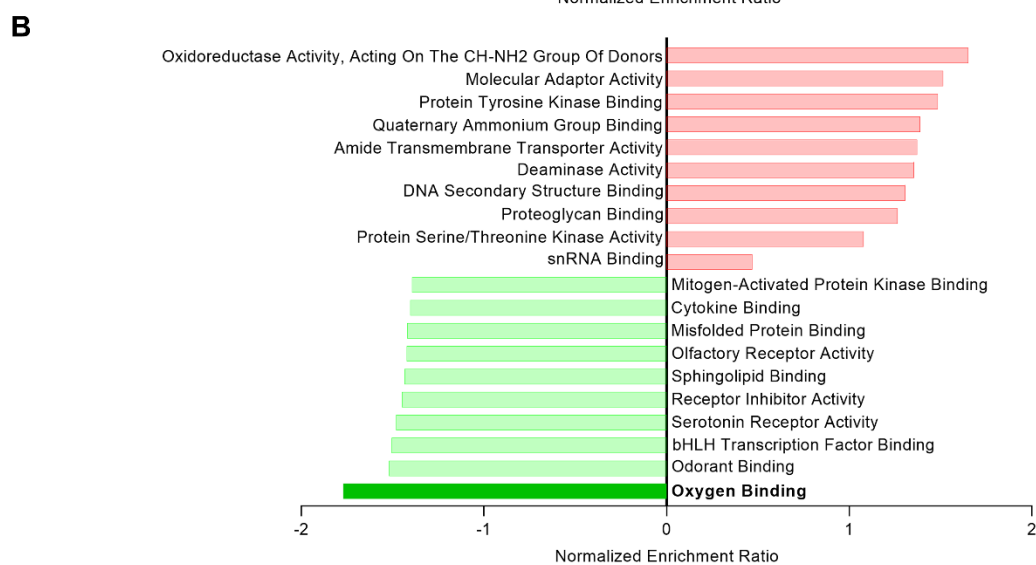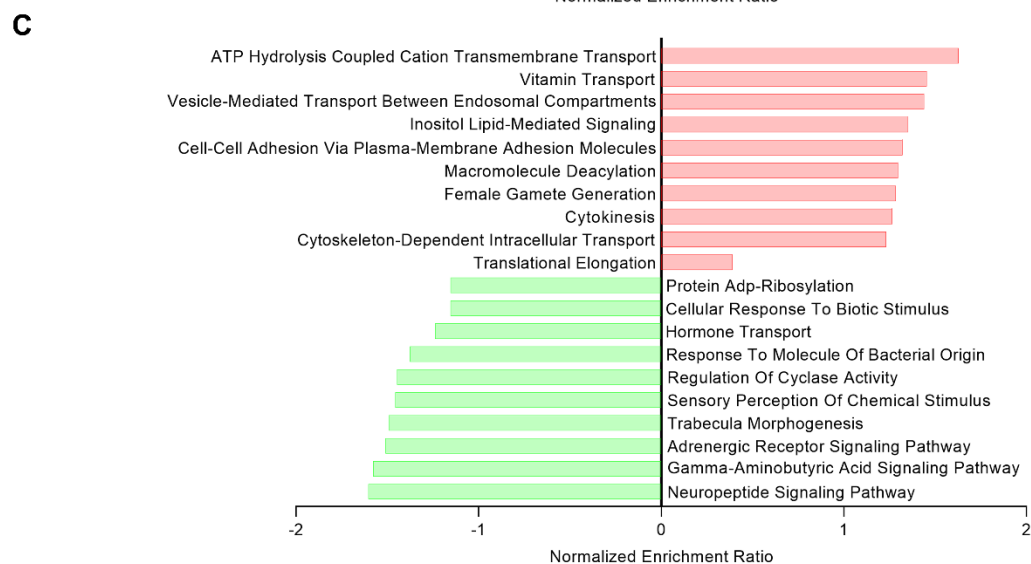



**S8 Fig. Gene Set Enrichment Analysis of HG-cultured BeWo cytotrophoblast transcripts.**

(A) Top 10 up-regulated and down-regulated Wikipathways gene sets and (B) top 10 up-regulated and down-regulated Gene Ontology (GO) molecular function gene sets, and (C) top 10 up-regulated and down-regulated GO biological processes gene sets (by normalized enrichment ratio) in HG-cultured BeWo CT cells. Green bars represent down-regulated gene sets and red-bars represent up-regulated gene sets, with dark green bars representing significantly down-regulated gene sets (FDR- $p < 0.25$ ). The transcripts identified in the microarray were ranked by signal-to-noise ratio using the Gene Set Enrichment Analysis Software, and enrichment analysis was performed using WebGestalt.

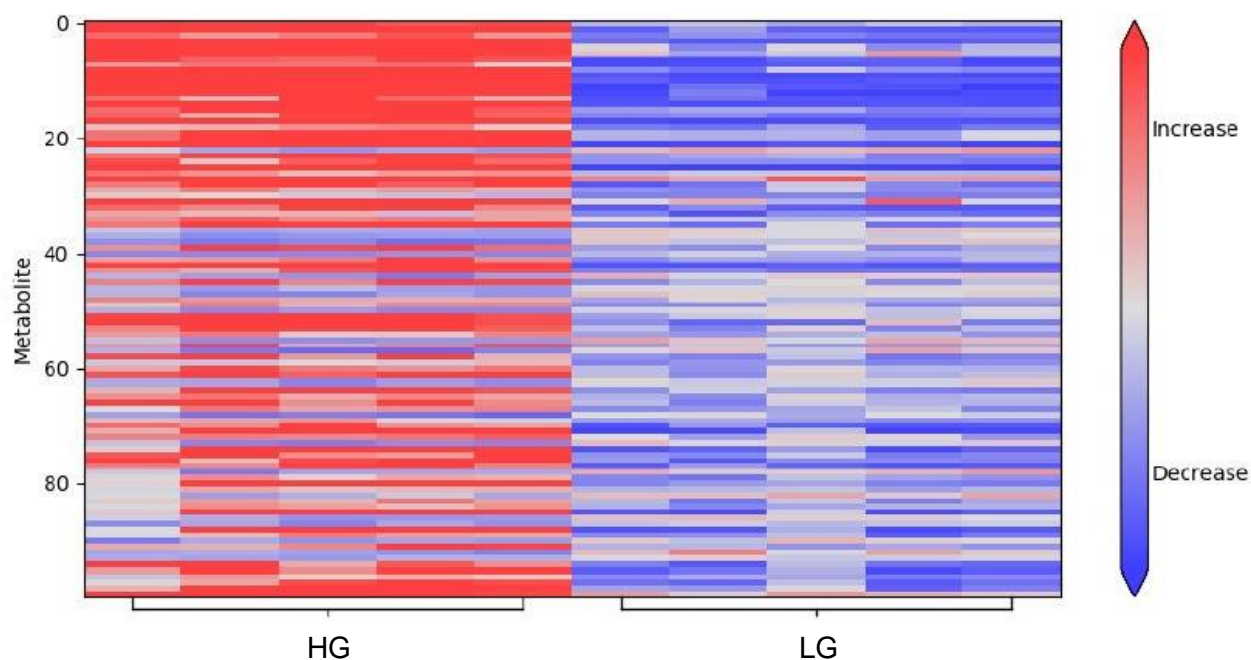

**S9 Fig. Heat Map visualization of differentially abundant metabolites in hyperglycemic (HG) cultured BeWo cytotrophoblast cells.**

A heat map was constructed to visualize the top-100 (by p-value) differentially abundant metabolites in HG-cultured BeWo CT cells. Each column represents a different sample, and each row represents an individual differentially abundant metabolite. Metabolite abundance was color coded with red representing metabolites with increased abundance and blue representing metabolites with decreased abundance.

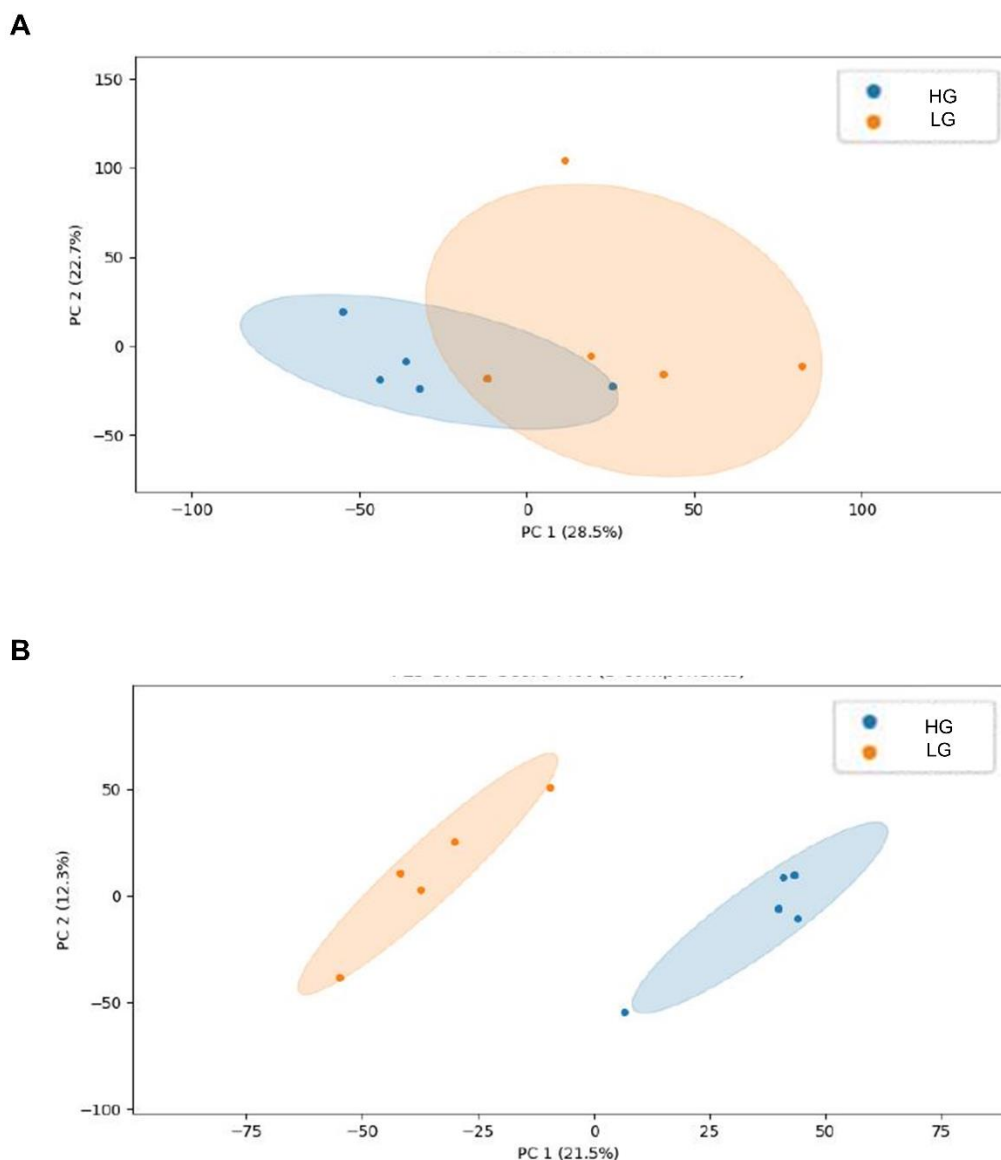

**S10 Fig. Visualization of the degree of separation between metabolite profiles in HG and LG cultured BeWo CT cells.**

(A) Unsupervised principal component analysis (PCA) and (B) supervised partial least squares discriminant analysis (PLS-DA) plots were constructed to visualize the separation in metabolite concentrations between LG and HG-cultured BeWo CT cells.
